# Supplementary material
Source: PubMed Central journal article supplement (PMC5070755)
Supplement: aasm.39.11.2013s1.pdf [file aasm.39.11.2013s1.pdf]

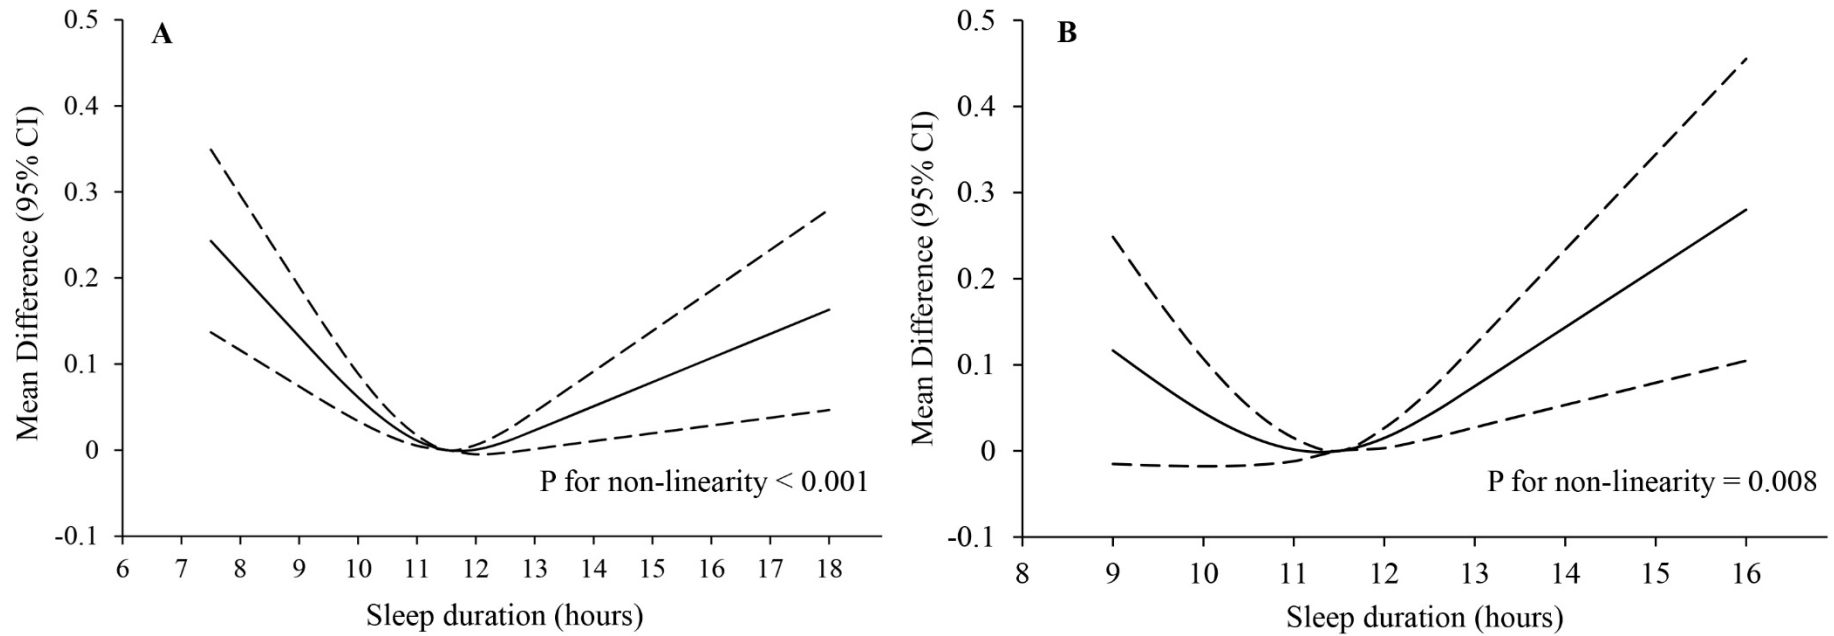

**Figure S1**-Curvilinear associations between sleep duration and children's BMI in cross-sectional and longitudinal analyses. (A) association in cross-sectional analyses; (B) association in longitudinal analyses. Y-axis represents the difference in BMI between children with any value of sleep duration with children with 11.5 hours of sleep. All analyses were adjusted for child's age, gender, birth weight, breastfeeding status, appetite and physical activity, maternal age at delivery, maternal body mass index, education and occupation. CI, confidence interval.

**Table S1**-Effect modification of gender on association between sleep duration and overweight/obesity in cross-sectional analyses.

|                                | Risk of overweight  |             |                     |                   | Risk of obesity     |             |                     |                   |
|--------------------------------|---------------------|-------------|---------------------|-------------------|---------------------|-------------|---------------------|-------------------|
|                                | ≤10 hours           | 11-12 hours | ≥13 hours           | P for interaction | ≤10 hours           | 11-12 hours | ≥13 hours           | P for interaction |
| Gender                         |                     |             |                     | 0.57              |                     |             |                     | 0.44              |
| Boy                            | 1.09<br>(1.01-1.19) | 1.00        | 1.16<br>(1.06-1.26) |                   | 1.25<br>(1.08-1.44) | 1.00        | 1.20<br>(1.03-1.40) |                   |
| Girl                           | 1.17<br>(1.06-1.29) | 1.00        | 1.16<br>(1.05-1.29) |                   | 1.26<br>(1.03-1.53) | 1.00        | 1.36<br>(1.11-1.67) |                   |
| Appetite                       |                     |             |                     | 0.02              |                     |             |                     | 0.004             |
| More than peers                | 1.12<br>(1.04-1.20) | 1.00        | 1.12<br>(1.04-1.20) |                   | 1.10<br>(0.80-1.50) | 1.00        | 1.99<br>(1.45-2.74) |                   |
| The same as or less than peers | 1.17<br>(1.01-1.35) | 1.00        | 1.50<br>(1.26-1.78) |                   | 1.26<br>(1.11-1.43) | 1.00        | 1.16<br>(1.02-1.33) |                   |

Prevalence ratios and 95% confidence intervals were adjusted for child's age, gender, birth weight, breastfeeding status, appetite and physical activity, maternal age at delivery, maternal body mass index, education and occupation.

**Table S2**-Effect modification of gender on association between sleep duration and overweight/obesity in longitudinal analyses.

|                                | Risk of overweight  |             |                     |                   | Risk of obesity     |             |                     |                   |
|--------------------------------|---------------------|-------------|---------------------|-------------------|---------------------|-------------|---------------------|-------------------|
|                                | ≤10 hours           | 11-12 hours | ≥13 hours           | P for interaction | ≤10 hours           | 11-12 hours | ≥13 hours           | P for interaction |
| Gender                         |                     |             |                     | 0.35              |                     |             |                     | 0.39              |
| Boy                            | 1.32<br>(1.05-1.66) | 1.00        | 1.11<br>(0.88-1.41) |                   | 1.47<br>(0.97-2.23) | 1.00        | 1.22<br>(0.80-1.88) |                   |
| Girl                           | 1.66<br>(1.32-2.09) | 1.00        | 1.16<br>(0.91-1.48) |                   | 2.26<br>(1.44-3.54) | 1.00        | 1.21<br>(0.70-2.08) |                   |
| Appetite                       |                     |             |                     | 0.61              |                     |             |                     | 0.61              |
| More than peers                | 1.43<br>(1.19-1.71) | 1.00        | 1.11<br>(0.93-1.33) |                   | 1.71<br>(1.22-2.39) | 1.00        | 1.16<br>(0.81-1.66) |                   |
| The same as or less than peers | 1.79<br>(1.22-2.62) | 1.00        | 1.14<br>(0.70-1.84) |                   | 2.27<br>(1.07-4.83) | 1.00        | 1.48<br>(0.57-3.86) |                   |

Risk ratios and 95% confidence intervals were adjusted for child's age, gender, birth weight, breastfeeding status, appetite and physical activity, maternal age at delivery, maternal body mass index, education and occupation.

**Table S3-**Child and maternal characteristic of those included in the longitudinal analyses (attendees) and those lost to follow up (non-attendees).

|                                             | n      | Preschool-aged Children |               | P Value |
|---------------------------------------------|--------|-------------------------|---------------|---------|
|                                             |        | Attendees               | Non-attendees |         |
| Gender                                      |        |                         |               | 0.58    |
| Boy                                         | 19,350 | 7,712 (48.1)            | 11,638 (48.4) |         |
| Girl                                        | 20,725 | 8,316 (51.9)            | 12,409 (51.6) |         |
| Birth weight (g)                            |        |                         |               | 0.51    |
| 2,500-2,999                                 | 7,080  | 2,845 (17.8)            | 4,235 (17.6)  |         |
| 3,000-3,499                                 | 21,186 | 8,512 (53.1)            | 12,674 (52.7) |         |
| 3,500-3,999                                 | 11,809 | 4,671 (29.1)            | 7,138 (29.7)  |         |
| Breastfeeding status                        |        |                         |               | 0.59    |
| Never                                       | 2,045  | 806 (5.0)               | 1,239 (5.2)   |         |
| Ever                                        | 38,030 | 15,222 (95.0)           | 22,808 (94.8) |         |
| Appetite                                    |        |                         |               | 0.14    |
| More than peers                             | 31,954 | 12,855 (80.2)           | 19,099 (79.6) |         |
| The same as or less than peers              | 8,051  | 3,166 (19.8)            | 4,885 (20.4)  |         |
| Physical activity                           |        |                         |               | 0.09    |
| ≤ 2 hours/day                               | 3,399  | 1,315 (8.2)             | 2,084 (8.7)   |         |
| > 2 hours/day                               | 36,621 | 14,711 (91.8)           | 21,910 (91.3) |         |
| Mother's age at delivery (year)             |        |                         |               | < 0.001 |
| < 25                                        | 23,916 | 9,263 (57.8)            | 14,653 (60.9) |         |
| 25-29                                       | 11,513 | 4,681 (29.2)            | 6,832 (28.4)  |         |
| ≥ 30                                        | 4,646  | 2,084 (13.0)            | 2,562 (10.7)  |         |
| BMI at first screening (kg/m <sup>2</sup> ) |        |                         |               | < 0.001 |
| < 18.5                                      | 8,307  | 3,142 (19.6)            | 5,165 (21.5)  |         |
| 18.5-24.9                                   | 29,714 | 12,011 (74.9)           | 17,703 (73.6) |         |
| ≥ 25                                        | 2,054  | 875 (5.5)               | 1,179 (4.9)   |         |
| Maternal education                          |        |                         |               | 0.06    |
| < High school                               | 28,729 | 11,552 (72.1)           | 17,177 (71.5) |         |
| High school                                 | 7,664  | 2,977 (18.6)            | 4,687 (19.5)  |         |
| > High school                               | 3,652  | 1,487 (9.3)             | 2,165 (9.0)   |         |
| Maternal occupation                         |        |                         |               | 0.79    |
| Farmer                                      | 25,966 | 10,397 (65.0)           | 15,569 (64.8) |         |
| Other                                       | 14,047 | 5,605 (35.0)            | 8,442 (35.2)  |         |

Data are presented as number (column percentage) of children unless otherwise indicated. BMI, body mass index.
